# Supplementary material for: Impact of the surface aging of potable water plastic pipes on their lead deposition characteristics
Source: Royal Society of Chemistry journal article supplement (doi:10.1039/d3ew00043e), 2023-01-01
Supplement: d3ew00043e1.pdf [file d3ew00043e1.pdf]

## Supplemental Information (SI)

### Investigate the Impacts of Potable Water Plastic Pipes Surface Aging on their Lead Deposition Characteristics

Md Haddiuzaman<sup>1</sup>, David Ladner<sup>2</sup>, Maryam Salehi<sup>3\*</sup>

<sup>1</sup>*Department of Civil Engineering, The University of Memphis, Memphis, TN, USA*

<sup>2</sup>*Department of Environmental Engineering and Earth Sciences, Clemson University, Anderson, SC, USA*

<sup>3\*</sup>*Department of Civil and Environmental Engineering, University of Missouri, Columbia, MO, USA*

[mshfp@missouri.edu](mailto:mshfp@missouri.edu) , [msalehiesf@gmail.com](mailto:msalehiesf@gmail.com)

#### Table of Contents

SI-1 Statistical Analysis

#### List of SI-Tables

**Table SI-1:** The chemical constituents of synthetic stormwater

#### List of SI-Figures

**Figure SI-1.** Custom apparatus used to measure the zeta potential of HDPE pipes' inner walls.

**Figure SI-2.** XPS long scans of (a) new PEX-A, (b) 14 d aged PEX-A, (c) new HDPE, and (d) 14 d aged HDPE

### SI-1 Statistical Analysis

IBM SPSS version: 29.0.0.0 (241) and Microsoft Excel were used to conduct the statistical analysis. ANCOVA and student's t-test were used to examine whether the Pb accumulation on the various samples differed significantly from one another. A 95% corresponding confidence range was used to calculate statistical significance.

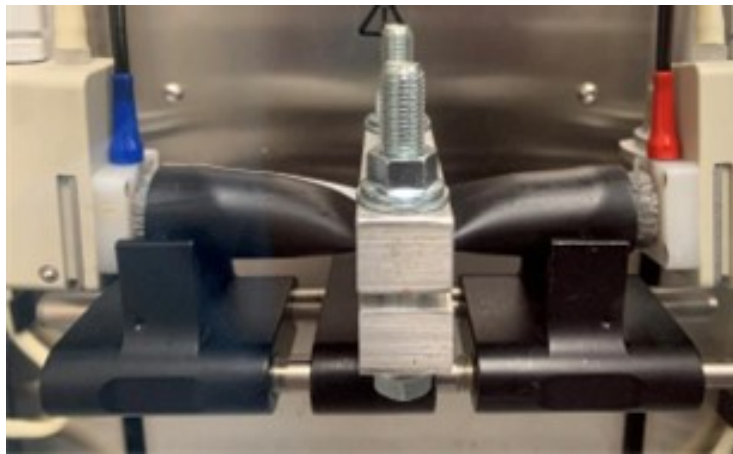

**Figure SI-1:** Custom apparatus used to measure the zeta potential of HDPE pipes' inner walls

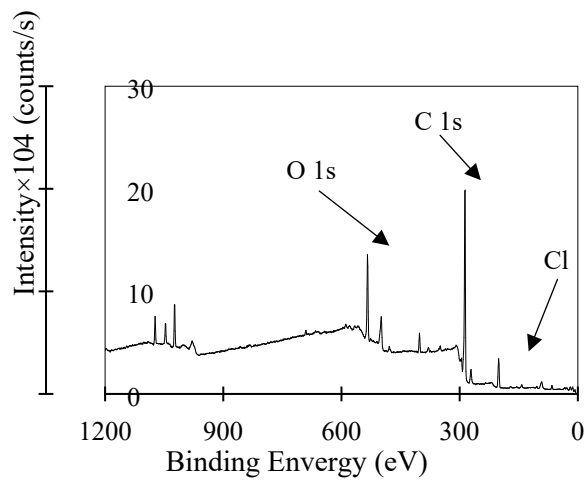

(a) new PEX-A

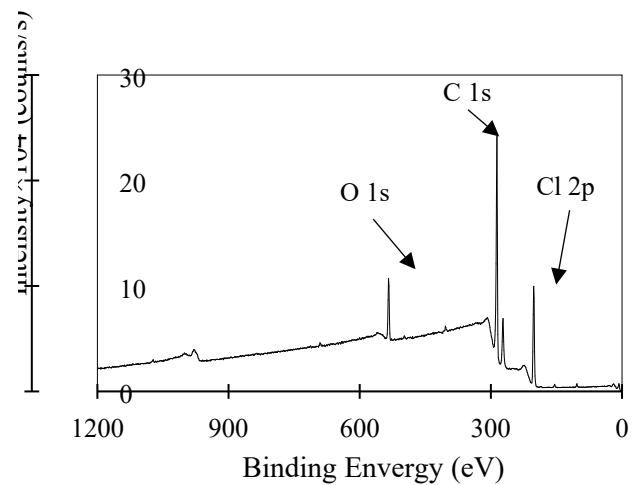

(b) 14 d aged PEX-A

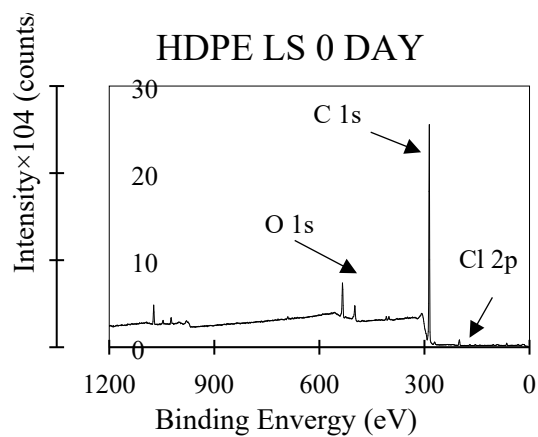

(c) new HDPE

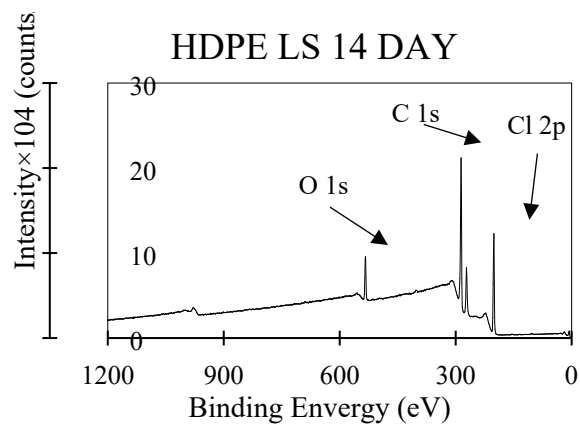

(d) 14 d aged HDPE

**Figure SI-2:** XPS long scans of (a) new PEX-A, (b) 14 d aged PEX-A, (c) new HDPE, and (d) 14 d aged HDPE

**Table SI-1:** The chemical constituents of synthetic tap water

| Chemicals                                                           | Concentration (g/L) | Chemicals                                           | Concentration, (g/L) |
|---------------------------------------------------------------------|---------------------|-----------------------------------------------------|----------------------|
| MgSO <sub>4</sub> .7H <sub>2</sub> O                                | 0.201               | Na <sub>2</sub> SiO <sub>3</sub> .9H <sub>2</sub> O | 0.049                |
| Al <sub>2</sub> (SO <sub>4</sub> ) <sub>3</sub> .18H <sub>2</sub> O | 0.004               | CaSO <sub>4</sub> .2H <sub>2</sub> O                | 0.051                |
| KNO <sub>3</sub>                                                    | 0.013               | CaCl <sub>2</sub> .2H <sub>2</sub> O                | 0.120                |
| NaHCO <sub>3</sub>                                                  | 0.039               | Na <sub>2</sub> HPO <sub>4</sub> .7H <sub>2</sub> O | 0.003                |
